# Supplementary material for: Permutational, topological, stereochemical, kinetic, and mechanistic studies of some six-coordinate metal chelate complexes of group (IV) elements
Source: Royal Society of Chemistry journal article supplement (doi:10.1039/c8ra04600j), 1975-01-01
Supplement: c8ra04600j1.pdf [file c8ra04600j1.pdf]

## Supplementary data

# Lead (Pb<sup>2+</sup>) sorptive removal using chitosan- modified biochar: batch and fixed-bed studies

Narada Bombuwala Dewage,<sup>a</sup> Ruth E. Fowler<sup>a</sup> Charles U. Pittman Jr.,<sup>a</sup> Dinesh Mohan<sup>b</sup> and  
Todd Mlsna<sup>\*a</sup>

<sup>a</sup> Department of Chemistry, Mississippi State University, Starkville, Mississippi 39762, United  
States

<sup>b</sup> School of Environmental Sciences, Jawaharlal Nehru University, New Delhi 110067, India

10  
11  
12  
13  
14  
15  
16  
17  
18  
19  
20  
21  
22  
23  
24  
25  
26  
27

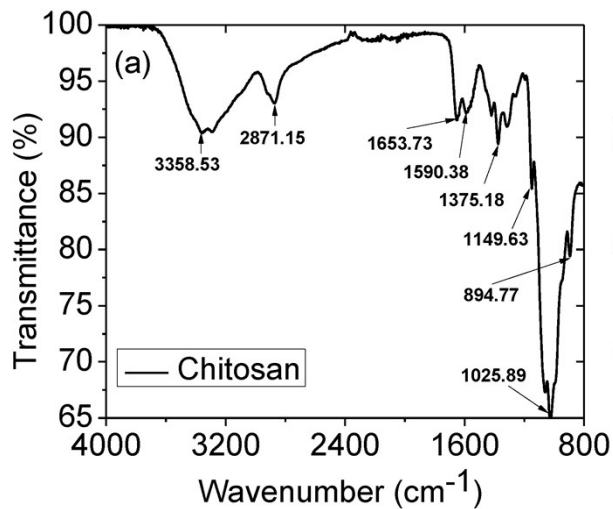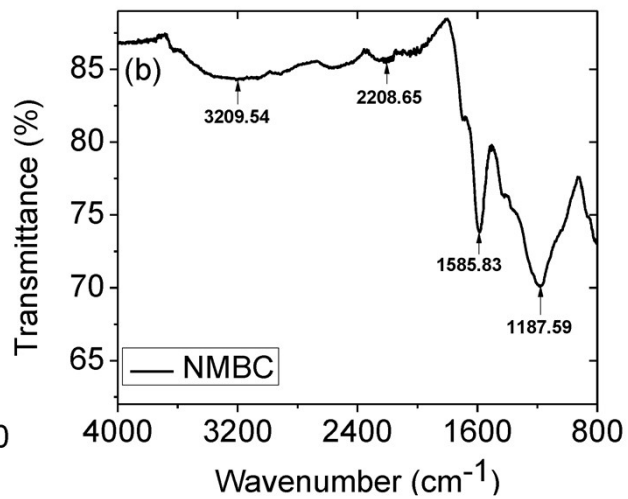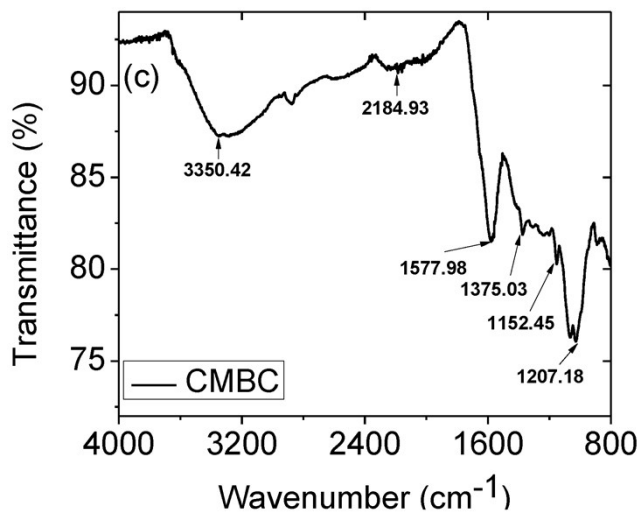

28

29

30

31

32 **Fig. S1** FTIR spectra of (a) chitosan, (b) NMBC, and (c) CMBC.

33

34

35

36

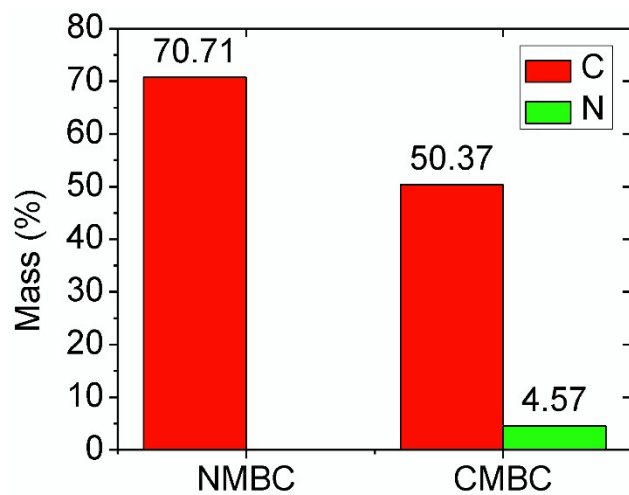

37

38 **Fig. S2** C and N elemental analysis by combustion of NMBC and CMBC.

39

40

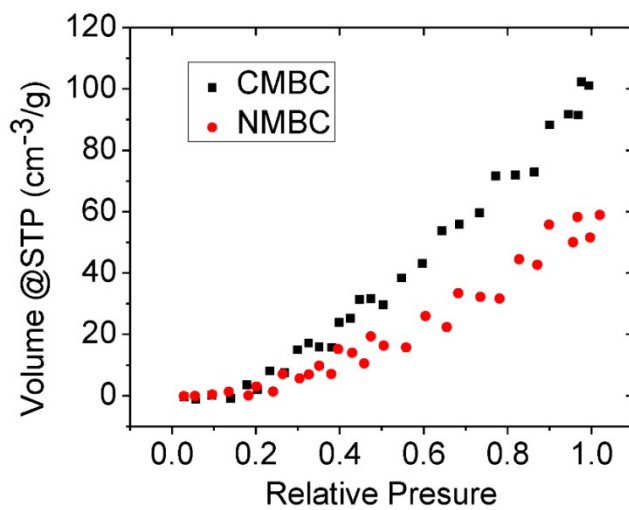

41

42

43 **Fig. S3** N<sub>2</sub> adsorption isotherm of CMBC and NMBC.

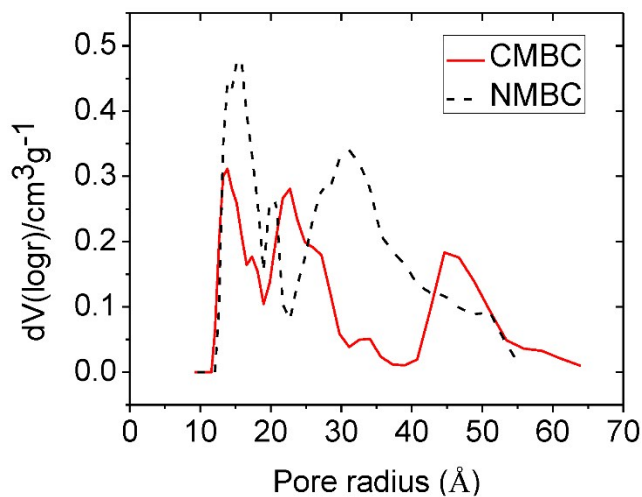

44

45 **Fig. S4** Non-Local Density Functional Theory (NLDFT) pore size distribution curves of CMBC

46 and NMBC.

47

48

49

50

51

52

53

54

55

56

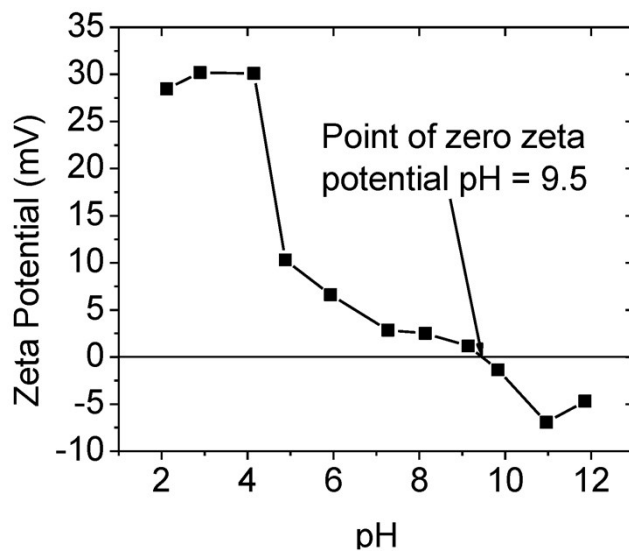

57 **Fig. S5** The  $\zeta$ -Potential of CMBC under different solution pH values.

58

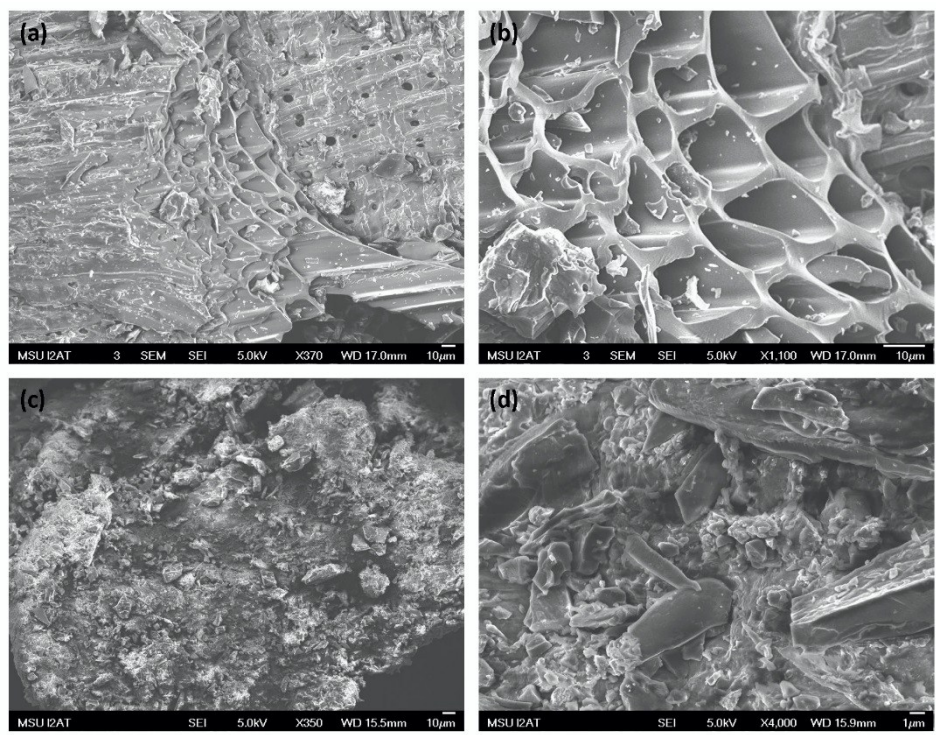

59

60 **Fig. S6** SEM images of NMBC (a, b) and CMBC (c, d). The chitosan coating process appears to  
 61 block some of the mesoporous cell surfaces including some pore openings.

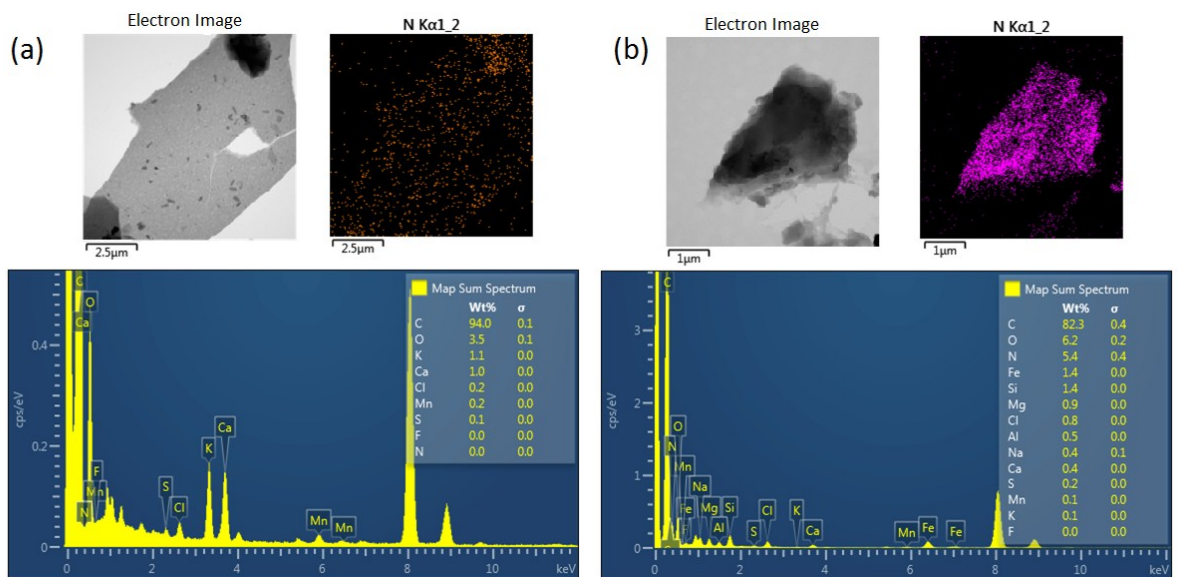

62

63 **Fig. S7** Electron images, N elemental mapping, and EDX spectra of NMBC (a) and CMBC (b).

64

65

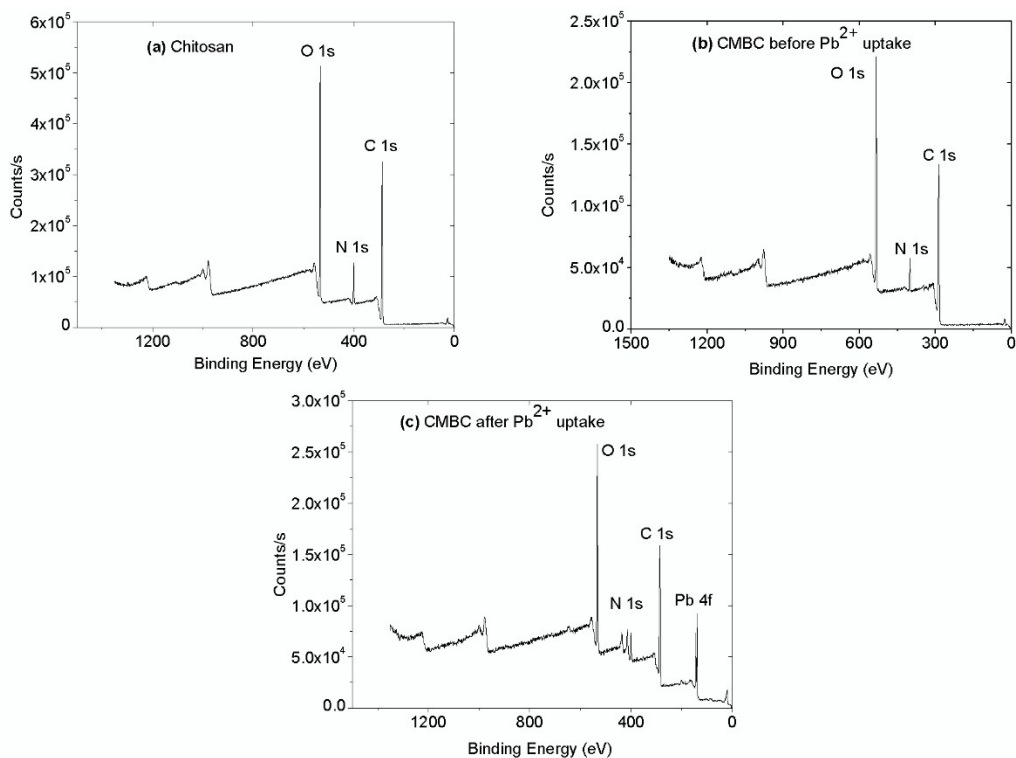

66

67 **Fig. S8** Survey XPS spectra of (a) chitosan (b) CMBC before and (c) CMBC after lead  
68 adsorption.

69

70

71

72

73

74

75

76

77

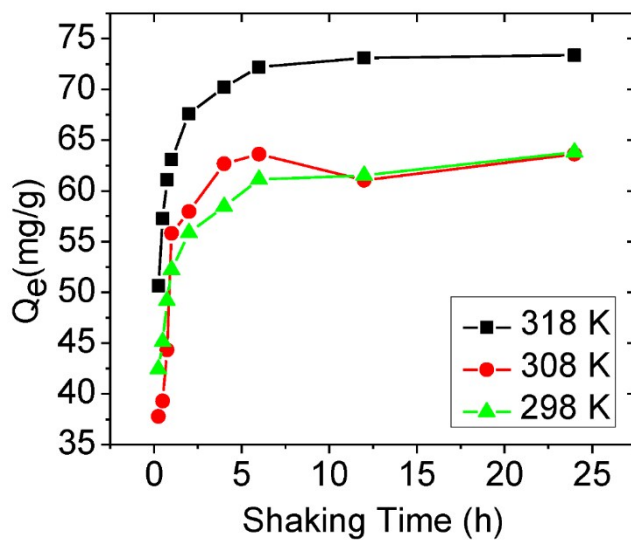

78 **Fig. S9** Temperature effect on lead adsorption at pH 5.0 and at 150 mg/L of lead solution using 2g  
79 CMBC/L.

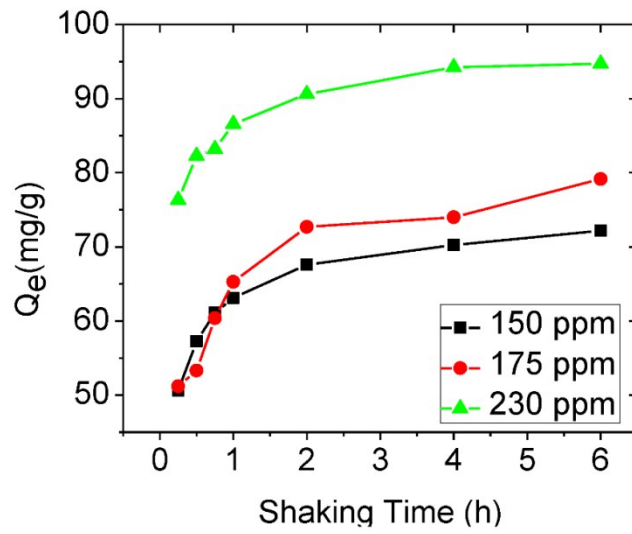

80

81 **Fig. S10** The effect of the initial Pb concentration on capacity versus the shaking time at pH 5  
82 using 2 g CMBC/L.

83

84

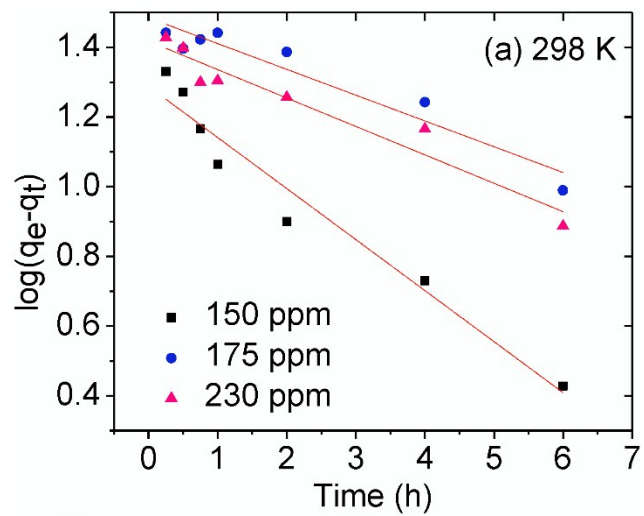

85

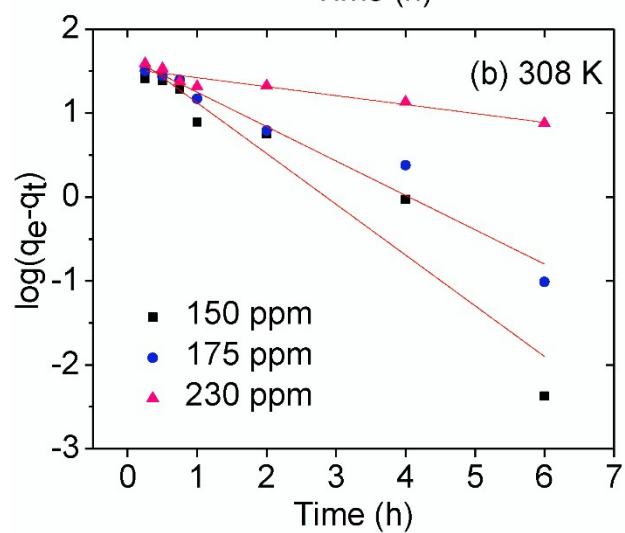

86

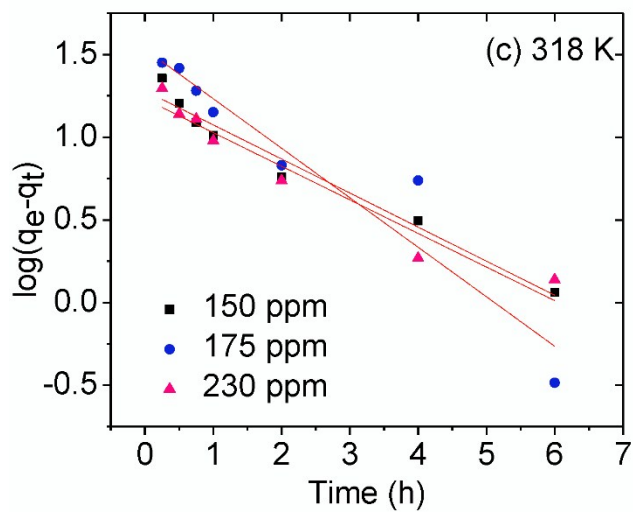

87

88



89 **Fig. S11** Pseudo-first order plots for lead adsorption (pH=5) at (a) 298 K, (b) 308 K, and (c) 318  
90 K for adsorbate concentrations of 150,175, and 230 mg/L.

91

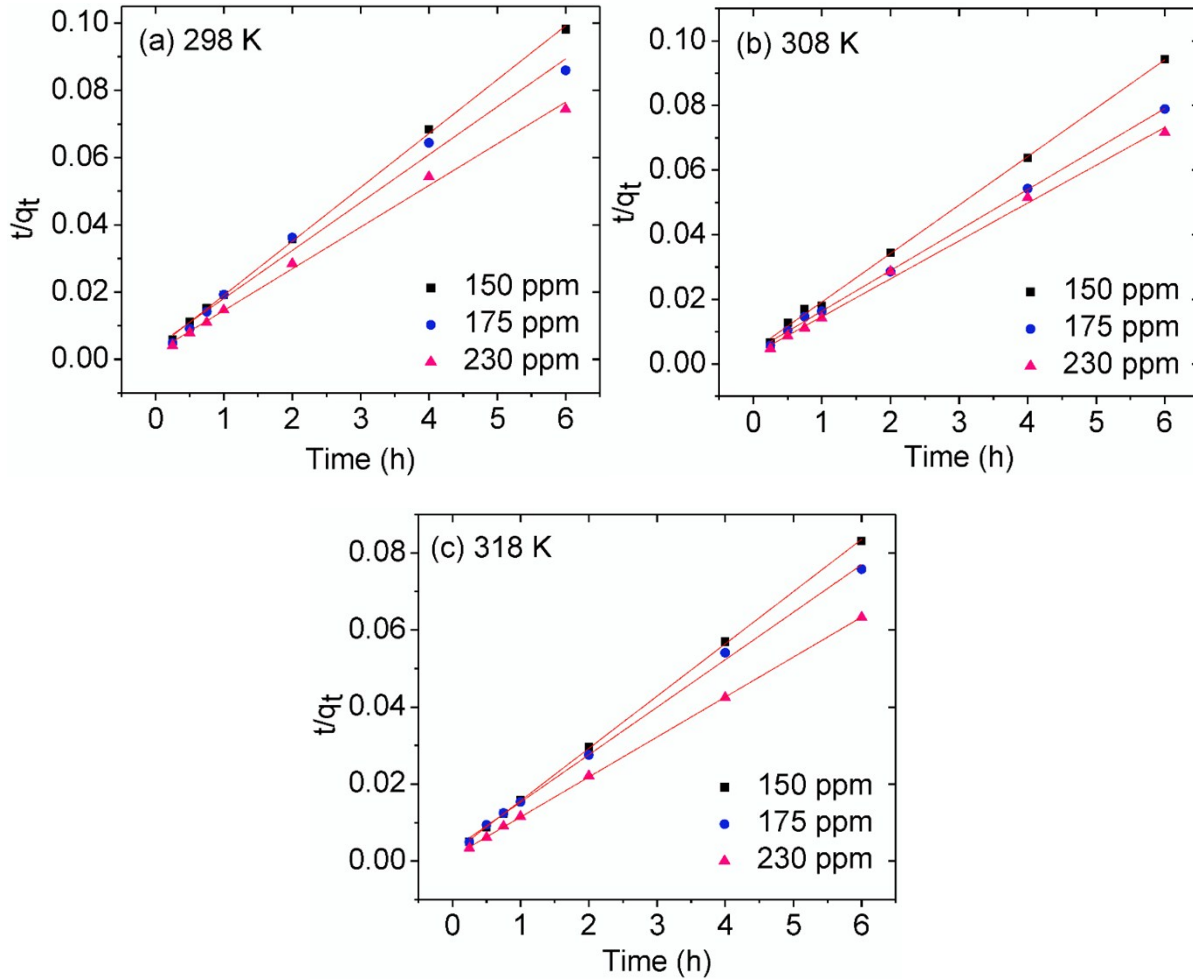

92

93

94

95 **Fig. S12** Pseudo-second order plots for lead adsorption (pH = 5) at (a) 298 K, (b) 308 K, and (c)  
 96 318 K for  $Pb^{2+}$  concentrations of 150, 175, and 230 mg/L and 2 g CMBC/L.

97

98

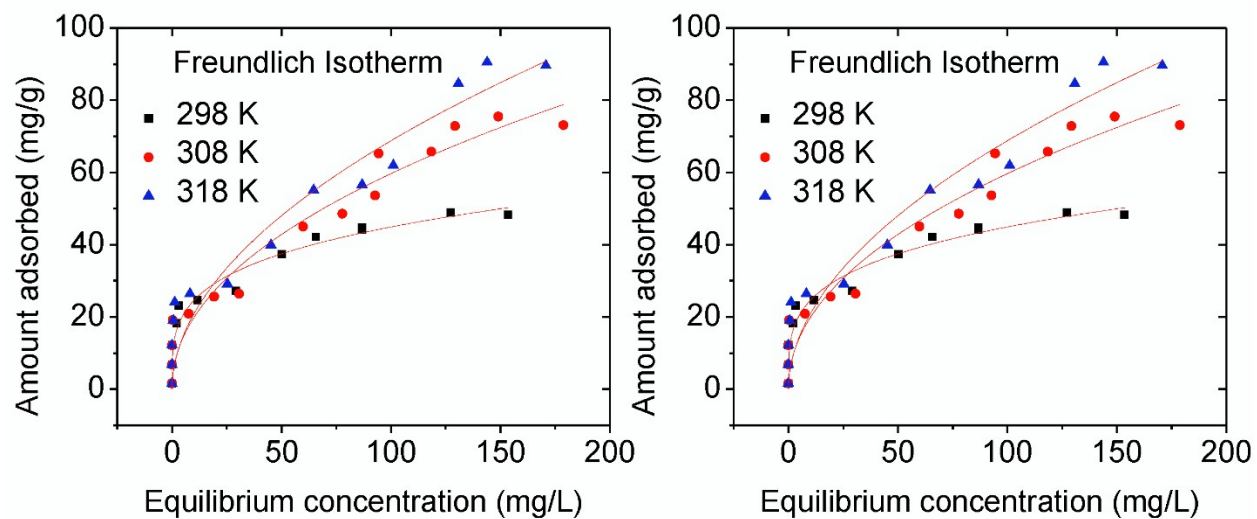

99

100

101 **Fig. S13** Adsorption isotherms at 298, 308, and 318 K [pH = 5; adsorbent concentration = 2 g/L;  
 102 Shaking time = 12 h].

103

104

105 **Table S1** Combustion analysis, ash content, surface areas, and pore radius analysis for CMBC  
 106 and NMBC

| Sample | C<br>(wt.%) | N<br>(wt.%) | Ash<br>content<br>(wt.%) | Surface<br>area<br>(m <sup>2</sup> /g) | Mesopore<br>volume<br>(cm <sup>3</sup> /g) | Micropore<br>volume<br>(cm <sup>3</sup> /g) | Total<br>average<br>pore<br>volume<br>(cm <sup>3</sup> /g) | Density<br>functional<br>theory<br>pore<br>radius<br>(nm) |
|--------|-------------|-------------|--------------------------|----------------------------------------|--------------------------------------------|---------------------------------------------|------------------------------------------------------------|-----------------------------------------------------------|
| NMBC   | 70.71       | 0.00        | 1.43                     | 10.5                                   | 0.0911                                     | 0.000                                       | 0.091                                                      | 1.385                                                     |
| CMBC   | 50.37       | 4.57        | 2.55                     | 7.13                                   | 0.160                                      | 0.000                                       | 0.160                                                      | 1.385                                                     |

107

108

109

110

111

112

113 **Table S2** The extent of protonation of chitosan at different pH values

114

115

116

117

118

119

| pH  | % extent<br>of protonation |
|-----|----------------------------|
| 4.3 | 99                         |
| 5.3 | 91                         |
| 6.3 | 50                         |
| 7.3 | 9                          |

120

121 **Table S3** Pseudo-first order parameters for lead adsorption (pH=5) at (a) 298 K, (b) 308 K, and  
122 (c) 318 K  
123  
124 K

| <b>Pseudo-first order parameters</b> |                         |                               |                                |                                                         |                |
|--------------------------------------|-------------------------|-------------------------------|--------------------------------|---------------------------------------------------------|----------------|
| Temp.<br>(K)                         | Initial conc.<br>(mg/L) | q <sub>e</sub> exp.<br>(mg/g) | q <sub>e</sub> calc.<br>(mg/g) | k <sub>1</sub><br>(g mg <sup>-1</sup> h <sup>-1</sup> ) | R <sup>2</sup> |
| 298                                  | 150                     | 63.81                         | 19.36                          | 0.336                                                   | 0.958          |
|                                      | 175                     | 79.59                         | 30.48                          | 0.170                                                   | 0.925          |
|                                      | 230                     | 88.32                         | 26.12                          | 0.187                                                   | 0.934          |
| 308                                  | 150                     | 63.61                         | 53.33                          | 1.391                                                   | 0.927          |
|                                      | 175                     | 76.14                         | 45.50                          | 0.942                                                   | 0.961          |
|                                      | 230                     | 91.34                         | 33.81                          | 0.244                                                   | 0.918          |
| 318                                  | 150                     | 73.35                         | 19.10                          | 0.474                                                   | 0.970          |
|                                      | 175                     | 79.47                         | 34.04                          | 0.689                                                   | 0.915          |
|                                      | 230                     | 96.09                         | 17.02                          | 0.468                                                   | 0.948          |

126 adsorbate concentrations of 150, 175, and 230 mg/L

127

128

129

130

131

132

133

134
